# Supplementary material for: Sensitive detection methods are key to identify secondary EGFR c.2369C>T p.(Thr790Met) in non-small cell lung cancer tissue samples
Source: Springer Nature journal article supplement (doi:10.1186/s12885-020-06831-3), 2020-05-01
Supplement: MOESM1 [file 17948206]

**Supplemental Table 1: Preparation of the in-house cell lines distributed in the 2013 and 2014 ESP EQA schemes**

|                |                                                                                                                                                                                                                                                                                                                                                |
|----------------|------------------------------------------------------------------------------------------------------------------------------------------------------------------------------------------------------------------------------------------------------------------------------------------------------------------------------------------------|
| Title          | Sensitive detection methods are key to identify secondary EGFR c.2369C>T p.(Thr790Met) in non-small cell lung cancer tissue samples.                                                                                                                                                                                                           |
| Journal        | BMC Cancer                                                                                                                                                                                                                                                                                                                                     |
| Authors        | Cleo Keppens, Elisabeth MC Dequeker, Etienne Rouleau, Nils 't Hart, Lukas Bubendorf, Kelly Dufraing, Céline Garrec, Paul Guéguen, Aude Lamy, Antonio Marchetti, Patrick Pauwels, Ales Ryska, Véronique Tack, Luigi Tornillo, Kaat Van Casteren, Jan H von der Thüsen, Karen Zwaenepoel, Birgit Lissenberg-Witte, Erik Thunnissen, Ed Schuuring |
| Correspondence | Prof. dr. Ed Schuuring<br>Department of Pathology (HPC EA10)<br>University Medical Center Groningen<br>PO Box 30001, 9700 RB<br>Groningen, the Netherlands<br>Tel: (+31) 50 361 9623<br>Email: e.schuuring@umcg.nl                                                                                                                             |

**Supplemental table 1: Preparation of the in-house cell lines distributed in the 2013 and 2014 ESP EQA schemes**

| Provider | Sample type | Scheme year | Ratio <i>EGFR</i> mutated cell-line/ <i>EGFR</i> wild-type cell line | 1 <sup>st</sup> <i>EGFR</i> Variant | VAF variant 1 (in %) | 2 <sup>nd</sup> <i>EGFR</i> variant | VAF variant 2 (in %) |
|----------|-------------|-------------|----------------------------------------------------------------------|-------------------------------------|----------------------|-------------------------------------|----------------------|
| ESP      | Cell line   | 2013        | 50%/50%                                                              | c.2369C>T p.(Thr790Met)             | 25 <sup>†</sup>      | c.2573T>G p.(Leu858Arg)             | 25 <sup>†</sup>      |
|          |             | 2014        | 90%/10%                                                              |                                     | 45 <sup>†</sup>      |                                     | 45 <sup>†</sup>      |
|          |             |             | 50%/50%                                                              |                                     | 25 <sup>†</sup>      |                                     | 25 <sup>†</sup>      |

In-house cell lines were created by mixing cell lines with the *EGFR* mutation with an *EGFR*-wild-type cell line in a ratio indicated in the respective column. The homogeneous mixed cells were fixed for one hour in neutral-buffered formalin, mixed with warm agar (all cells distributed in 4 tubes) and the agar plugs were embedded in paraffin-blocks conform standard histopathology procedures. Paraffin blocks were cut to sections with a thickness of 4-5 µm, and were provided on glass slides. Refseq *EGFR*: LRG\_304t1 (NM\_005228.4). <sup>†</sup>Variant allele frequency based on the percentage of tumor cells. E.g. cell line of 50% tumor cells in a wild-type background was considered as a VAF of 25%. Abbreviations: *EGFR*, epidermal growth factor receptor; ESP, European Society of Pathology; LRG, Locus Reference Genomic; VAF, variant allele frequency.
