# Supplementary material for: Sensitive detection methods are key to identify secondary EGFR c.2369C>T p.(Thr790Met) in non-small cell lung cancer tissue samples
Source: Springer Nature journal article supplement (doi:10.1186/s12885-020-06831-3), 2020-05-01
Supplement: MOESM2 [file 17948206]

**Supplemental Table 2: Overview of applied test methods and reasons reported for the technical failures observed in the EQA schemes.**

|                |                                                                                                                                                                                                                                                                                                                                                |
|----------------|------------------------------------------------------------------------------------------------------------------------------------------------------------------------------------------------------------------------------------------------------------------------------------------------------------------------------------------------|
| Title          | Sensitive detection methods are key to identify secondary EGFR c.2369C>T p.(Thr790Met) in non-small cell lung cancer tissue samples.                                                                                                                                                                                                           |
| Journal        | BMC Cancer                                                                                                                                                                                                                                                                                                                                     |
| Authors        | Cleo Keppens, Elisabeth MC Dequeker, Etienne Rouleau, Nils 't Hart, Lukas Bubendorf, Kelly Dufraing, Céline Garrec, Paul Guéguen, Aude Lamy, Antonio Marchetti, Patrick Pauwels, Ales Ryska, Véronique Tack, Luigi Tornillo, Kaat Van Casteren, Jan H von der Thüsen, Karen Zwaenepoel, Birgit Lissenberg-Witte, Erik Thunnissen, Ed Schuuring |
| Correspondence | Prof. dr. Ed Schuuring<br>Department of Pathology (HPC EA10)<br>University Medical Center Groningen<br>PO Box 30001, 9700 RB<br>Groningen, the Netherlands<br>Tel: (+31) 50 361 9623<br>Email: e.schuuring@umcg.nl                                                                                                                             |

**Supplemental table 2: Overview of applied test methods and reasons reported for the technical failures observed in the EQA schemes.**

| Scheme year             | Sample type | c.2369C>T p.(Thr790Met) variant allele frequency (%) | Method used                                                  | Laboratory | Reason for technical failure              |
|-------------------------|-------------|------------------------------------------------------|--------------------------------------------------------------|------------|-------------------------------------------|
| 2013                    | Cell line   | 25                                                   | Cobas EGFR Mutation detection Test v1 (Roche)                | 1          | Inconclusive result                       |
|                         |             |                                                      |                                                              | 2          | No amplification                          |
|                         |             |                                                      | MAD-EGFR mut (Master Diagnostica S. L.)                      | 3          | DNA concentration too low                 |
|                         |             |                                                      | EGFR StripAssay (ViennaLab)                                  | 4          | DNA concentration too low                 |
|                         |             |                                                      | EGFR 29 Mutations Detection Kit (AmoyDx)                     | 5          | DNA quality too low                       |
|                         |             |                                                      | EGFR Mutation Analysis Reagents (Applied Biosystems)         | 6          | DNA concentration too low                 |
|                         |             |                                                      | Therascreen EGFR RGQ PCR Kit (Qiagen DxS)                    | 7          | Insufficient tissue material for analysis |
|                         |             |                                                      | Massarray 4 analyser (Sequenom)                              | 8          | DNA concentration too low                 |
|                         |             |                                                      | MassArray OncoCarta panel (Sequenom)                         | 9          | Sample did not pass QC                    |
|                         |             |                                                      | Dideoxy sequencing                                           | 10         | DNA concentration too low                 |
|                         |             |                                                      |                                                              | 11         | Inconclusive result                       |
|                         |             |                                                      |                                                              | 12         | No amplification                          |
|                         |             |                                                      | Pyrosequencing                                               | 13         | DNA concentration too low                 |
|                         |             |                                                      | High resolution melting                                      | 14         | No amplification                          |
|                         |             |                                                      | Missing data                                                 | 15         | DNA concentration too low                 |
| 2014                    | Cell line   | 17                                                   | Therascreen EGFR pyro Kit (Qiagen DxS)                       | 16         | Inconclusive result                       |
| 2015                    | Resection   | 15                                                   | Therascreen EGFR RGQ PCR Kit (Qiagen DxS)                    | 17         | DNA concentration too low                 |
|                         |             |                                                      |                                                              | 18         | DNA concentration too low                 |
|                         |             |                                                      | Ion AmpliSeq Colon and Lung Cancer Panel (Life technologies) | 19         | DNA concentration too low                 |
|                         |             |                                                      | Pyrosequencing                                               | 20         | DNA concentration too low                 |
| High resolution melting | 21          | DNA quality too low                                  |                                                              |            |                                           |
| 2016                    | Cell line   | 22                                                   | Oncomine Solid Tumour DNA kit (Life Technologies)            | 16         | No amplification                          |
| 2017                    | Cell line   | 20                                                   | Cobas EGFR Mutation detection Test v2 (Roche)                | 22         | Insufficient neoplastic cells             |
|                         |             |                                                      |                                                              | 23         | Insufficient neoplastic cells             |
|                         |             |                                                      | Cobas EGFR Mutation detection Test v1 (Roche)                | 24         | Insufficient neoplastic cells             |
| Dideoxy sequencing      | 25          | Insufficient neoplastic cells                        |                                                              |            |                                           |
