# Supplementary material for: Sensitive detection methods are key to identify secondary EGFR c.2369C>T p.(Thr790Met) in non-small cell lung cancer tissue samples
Source: Springer Nature journal article supplement (doi:10.1186/s12885-020-06831-3), 2020-05-01
Supplement: MOESM3 [file 17948206]

**Supplemental Table 3: Performance of different technique types related to time, number of EQA participations, sample type and variant allele frequency.**

|                |                                                                                                                                                                                                                                                                                                                                                |
|----------------|------------------------------------------------------------------------------------------------------------------------------------------------------------------------------------------------------------------------------------------------------------------------------------------------------------------------------------------------|
| Title          | Sensitive detection methods are key to identify secondary EGFR c.2369C>T p.(Thr790Met) in non-small cell lung cancer tissue samples.                                                                                                                                                                                                           |
| Journal        | BMC Cancer                                                                                                                                                                                                                                                                                                                                     |
| Authors        | Cleo Keppens, Elisabeth MC Dequeker, Etienne Rouleau, Nils 't Hart, Lukas Bubendorf, Kelly Dufraing, Céline Garrec, Paul Guéguen, Aude Lamy, Antonio Marchetti, Patrick Pauwels, Ales Ryska, Véronique Tack, Luigi Tornillo, Kaat Van Casteren, Jan H von der Thüsen, Karen Zwaenepoel, Birgit Lissenberg-Witte, Erik Thunnissen, Ed Schuurung |
| Correspondence | Prof. dr. Ed Schuurung<br>Department of Pathology (HPC EA10)<br>University Medical Center Groningen<br>PO Box 30001, 9700 RB<br>Groningen, the Netherlands<br>Tel: (+31) 50 361 9623<br>Email: <a href="mailto:e.schuuring@umcg.nl">e.schuuring@umcg.nl</a>                                                                                    |

**Supplemental table 3: Performance of different technique types related to time, number of EQA participations, sample type and variant allele frequency.**

|                                       | Commercial kit (n=656) |                             |                                    |                             |                                  | Next-generation sequencing (n=239)† |                             |                                    |                             |                                  | Non-commercial method (n=293)‡ |                             |                                    |                             |                                  | Total (n=1188)§ |                             |                                    |                             |                                  |
|---------------------------------------|------------------------|-----------------------------|------------------------------------|-----------------------------|----------------------------------|-------------------------------------|-----------------------------|------------------------------------|-----------------------------|----------------------------------|--------------------------------|-----------------------------|------------------------------------|-----------------------------|----------------------------------|-----------------|-----------------------------|------------------------------------|-----------------------------|----------------------------------|
|                                       | # tests                | % test with correct outcome | % tests with false-negative result | % tests with wrong mutation | % tests with a technical failure | # tests                             | % test with correct outcome | % tests with false-negative result | % tests with wrong mutation | % tests with a technical failure | # tests                        | % test with correct outcome | % tests with false-negative result | % tests with wrong mutation | % tests with a technical failure | # tests         | % test with correct outcome | % tests with false-negative result | % tests with wrong mutation | % tests with a technical failure |
| <b>EQA scheme year</b>                |                        |                             |                                    |                             |                                  |                                     |                             |                                    |                             |                                  |                                |                             |                                    |                             |                                  |                 |                             |                                    |                             |                                  |
| 2013                                  | 56                     | 77.6                        | 22.4                               | 0.0                         | 12.5***                          | 5                                   | 66.7                        | 33.3                               | 0.0                         | 40.0**                           | 44                             | 61.5**                      | 38.5**                             | 0.0                         | 11.4**                           | 105             | 70.3***                     | 29.7***                            | 0.0                         | 13.3***                          |
| 2014                                  | 291                    | 78.6***                     | 20.3***                            | 1.0                         | 0.3**                            | 23                                  | 95.7                        | 4.3                                | 0.0                         | 0.0                              | 161                            | 83.2                        | 16.1                               | 0.6                         | 0.0**                            | 475             | 81.0***                     | 18.1***                            | 0.8                         | 0.2***                           |
| 2015                                  | 58                     | 89.3                        | 10.7                               | 0.0                         | 3.4                              | 34                                  | 87.9**                      | 9.1*                               | 3.0                         | 2.9                              | 22                             | 65.0                        | 35.0                               | 0.0                         | 9.1                              | 114             | 84.4                        | 14.7                               | 0.9                         | 4.4                              |
| 2016                                  | 34                     | 100.0**                     | 0.0**                              | 0.0                         | 0.0                              | 37                                  | 100.0                       | 0.0                                | 0.0                         | 2.7                              | 12                             | 91.7                        | 8.3                                | 0.0                         | 0.0                              | 83              | 98.8***                     | 1.2***                             | 0.0                         | 1.2                              |
| 2017 (Jun.)                           | 61                     | 73.8**                      | 26.2**                             | 0.0                         | 0.0                              | 30                                  | 96.7                        | 3.3                                | 0.0                         | 0.0                              | 16                             | 81.3                        | 18.8                               | 0.0                         | 0.0                              | 107             | 81.3                        | 18.7                               | 0.0                         | 0.0                              |
| 2017 (Oct.)                           | 52                     | 100.0**                     | 0.0**                              | 0.0                         | 5.8                              | 32                                  | 100.0                       | 0.0                                | 0.0                         | 0.0                              | 18                             | 94.1                        | 5.9                                | 0.0                         | 5.6                              | 102             | 99.0***                     | 1.0***                             | 0.0                         | 3.9                              |
| 2018                                  | 104                    | 100.0***                    | 0.0***                             | 0.0                         | 0.0                              | 78                                  | 100.0                       | 0.0                                | 0.0                         | 0.0                              | 20                             | 100.0*                      | 0.0*                               | 0.0                         | 0.0                              | 202             | 100.0***                    | 0.0***                             | 0.0                         | 0.0*                             |
| <b>Number of EQA participations  </b> |                        |                             |                                    |                             |                                  |                                     |                             |                                    |                             |                                  |                                |                             |                                    |                             |                                  |                 |                             |                                    |                             |                                  |
| 1 <sup>st</sup>                       | 309                    | 79.3***                     | 19.7***                            | 1.0                         | 2.9                              | 43                                  | 90.0*                       | 10.0**                             | 0.0                         | 7.0*                             | 141                            | 71.1***                     | 28.1***                            | 0.7                         | 4.3                              | 493             | 77.9***                     | 21.2***                            | 0.8                         | 3.8**                            |
| 2 <sup>nd</sup>                       | 181                    | 88.3                        | 11.7                               | 0.0                         | 0.6                              | 59                                  | 96.6                        | 1.7                                | 1.7                         | 1.7                              | 99                             | 86.9                        | 13.1                               | 0.0                         | 0.0                              | 339             | 89.3                        | 10.4                               | 0.3                         | 0.6*                             |
| 3 <sup>rd</sup>                       | 70                     | 89.9                        | 10.1                               | 0.0                         | 1.4                              | 33                                  | 100.0                       | 0.0                                | 0.0                         | 0.0                              | 22                             | 95.2                        | 4.8                                | 0.0                         | 4.5                              | 125             | 93.5*                       | 6.5*                               | 0.0                         | 1.6                              |
| 4 <sup>th</sup>                       | 42                     | 90.0                        | 10.0                               | 0.0                         | 4.8                              | 40                                  | 97.5                        | 2.5                                | 0.0                         | 0.0                              | 11                             | 90.0                        | 10.0                               | 0.0                         | 9.1                              | 93              | 93.3                        | 6.7                                | 0.0                         | 3.2                              |
| 5 <sup>th</sup>                       | 30                     | 96.7                        | 3.3                                | 0.0                         | 0.0                              | 30                                  | 100.0                       | 0.0                                | 0.0                         | 0.0                              | 14                             | 100.0                       | 0.0                                | 0.0                         | 0.0                              | 74              | 98.6***                     | 1.4**                              | 0.0                         | 0.0                              |
| 6 <sup>th</sup>                       | 20                     | 100.0                       | 0.0                                | 0.0                         | 0.0                              | 24                                  | 100.0                       | 0.0                                | 0.0                         | 0.0                              | 6                              | 100.0                       | 0.0                                | 0.0                         | 0.0                              | 50              | 100.0**                     | 0.0**                              | 0.0                         | 0.0                              |
| 7 <sup>th</sup>                       | 4                      | 100.0                       | 0.0                                | 0.0                         | 0.0                              | 10                                  | 100.0                       | 0.0                                | 0.0                         | 0.0                              | /                              | /                           | /                                  | /                           | /                                | 14              | 100.0                       | 0.0                                | 0.0                         | 0.0                              |
| <b>Sample type</b>                    |                        |                             |                                    |                             |                                  |                                     |                             |                                    |                             |                                  |                                |                             |                                    |                             |                                  |                 |                             |                                    |                             |                                  |
| Cell line                             | 312                    | 91.7***                     | 7.6***                             | 0.7                         | 3.5**                            | 77                                  | 98.6                        | 1.4                                | 0.0                         | 3.9                              | 189                            | 86.3**                      | 13.1**                             | 0.5                         | 3.2                              | 578             | 90.9***                     | 8.6***                             | 0.5                         | 3.5**                            |
| Resection                             | 344                    | 79.5                        | 20.2                               | 0.3                         | 0.6                              | 162                                 | 96.3                        | 3.1                                | 0.6                         | 0.6                              | 104                            | 71.6                        | 28.4                               | 0.0                         | 1.9                              | 610             | 82.6                        | 17.0                               | 0.3                         | 0.8                              |
| <b>Variant allele frequency</b>       |                        |                             |                                    |                             |                                  |                                     |                             |                                    |                             |                                  |                                |                             |                                    |                             |                                  |                 |                             |                                    |                             |                                  |
| 11%-20%                               | 211                    | 88.8                        | 11.2                               | 0.0                         | 2.8                              | 111                                 | 95.5                        | 3.6                                | 0.9                         | 0.9                              | 87                             | 83.3                        | 15.5                               | 1.2                         | 3.4                              | 409             | 89.5*                       | 10.0*                              | 0.5                         | 2.4                              |
| 21%-30%                               | 300                    | 77.8***                     | 21.5***                            | 0.7                         | 2.3                              | 82                                  | 97.5                        | 2.5                                | 0.0                         | 3.7                              | 152                            | 75.5*                       | 24.5*                              | 0.0                         | 3.3                              | 534             | 80.2***                     | 19.5***                            | 0.4                         | 2.8                              |
| >40%                                  | 145                    | 95.2***                     | 4.1***                             | 0.7                         | 0.0                              | 46                                  | 100.0                       | 0.0                                | 0.0                         | 0.0                              | 54                             | 92.6*                       | 7.4*                               | 0.0                         | 0.0                              | 245             | 95.5***                     | 4.1***                             | 0.4                         | 0.0**                            |

Technical failures are represented with respect to the total number of tests. Correct results, false-negatives and wrong mutations are calculated in relation to the total number of analyzable tests (total tests minus technical failures). †The category ‘next-generation sequencing’ includes both commercial and in-house panels. ‡Non-commercial methods include in-house sequencing methods that are non-NGS based. §Two tests were excluded as no method information was available, bringing the total analyzed tests on 1188. The two excluded tests were performed in 2013 during a 1<sup>st</sup> EQA participation, on cell line material with an allele frequency of 25%, and resulted in one correct result and one technical failure. ||The first and second distribution round of the Lung 2017 scheme are counted as two separate participations (4 months apart). Abbreviations: #, number; /, not applicable; EQA, external quality assessment; NGS, next-generation sequencing. Chi-squared tests or Fisher’s Exact tests (for cell counts below 5) were used to assess significance. \*p<0.05, \*\*p<0.01, \*\*\*p<0.001.
