# Supplementary material for: Sensitive detection methods are key to identify secondary EGFR c.2369C>T p.(Thr790Met) in non-small cell lung cancer tissue samples
Source: Springer Nature journal article supplement (doi:10.1186/s12885-020-06831-3), 2020-05-01
Supplement: MOESM4 [file 17948206]

**Supplemental Table 4: Performance over time for the 11 most frequently used c.2369C>T p.(Thr790Met) detection methods..**

|                |                                                                                                                                                                                                                                                                                                                                                |
|----------------|------------------------------------------------------------------------------------------------------------------------------------------------------------------------------------------------------------------------------------------------------------------------------------------------------------------------------------------------|
| Title          | Sensitive detection methods are key to identify secondary EGFR c.2369C>T p.(Thr790Met) in non-small cell lung cancer tissue samples.                                                                                                                                                                                                           |
| Journal        | BMC Cancer                                                                                                                                                                                                                                                                                                                                     |
| Authors        | Cleo Keppens, Elisabeth MC Dequeker, Etienne Rouleau, Nils 't Hart, Lukas Bubendorf, Kelly Dufraing, Céline Garrec, Paul Guéguen, Aude Lamy, Antonio Marchetti, Patrick Pauwels, Ales Ryska, Véronique Tack, Luigi Tornillo, Kaat Van Casteren, Jan H von der Thüsen, Karen Zwaenepoel, Birgit Lissenberg-Witte, Erik Thunnissen, Ed Schuurung |
| Correspondence | Prof. dr. Ed Schuurung<br>Department of Pathology (HPC EA10)<br>University Medical Center Groningen<br>PO Box 30001, 9700 RB<br>Groningen, the Netherlands<br>Tel: (+31) 50 361 9623<br>Email: <a href="mailto:e.schuuring@umcg.nl">e.schuuring@umcg.nl</a>                                                                                    |

**Supplemental table 4: Performance over time for the 11 most frequently used c.2369C>T p.(Thr790Met) detection methods.**

| EQA scheme year | Method for c.2369C>T p.(Thr790Met) detection | Commercial kit                        |                                               |                                               |                                    |                                       | Next-generation sequencing                                                         |                                                              |                                                         | Non-commercial sequencing |                         |                                                  |
|-----------------|----------------------------------------------|---------------------------------------|-----------------------------------------------|-----------------------------------------------|------------------------------------|---------------------------------------|------------------------------------------------------------------------------------|--------------------------------------------------------------|---------------------------------------------------------|---------------------------|-------------------------|--------------------------------------------------|
|                 |                                              | Therascreen EGFR RGQ PCR Kit (Qiagen) | Cobas EGFR Mutation detection Test v1 (Roche) | Cobas EGFR Mutation detection Test v2 (Roche) | Therascreen EGFR Pyro Kit (Qiagen) | EGFR Mutation Analysis Kit (EntroGen) | Ion Ampliseq Custom panel - regions selected by the laboratory (Life technologies) | Ion AmpliSeq Colon and Lung Cancer Panel (Life technologies) | TruSight Tumor OncoPanel / TruSight Tumor 15 (Illumina) | Dideoxy sequencing        | High-resolution melting | TaqMan-based sequencing (ARMS/LNA/PNA/CAST-PCRs) |
| 2013            | # tests performed by method                  | 18                                    | 19                                            | /                                             | 7                                  | 3                                     | /                                                                                  | /                                                            | /                                                       | 32                        | 4                       | 4                                                |
| 2014            |                                              | 79                                    | 78                                            | /                                             | 50                                 | 38                                    | 6                                                                                  | /                                                            | /                                                       | 66                        | 38                      | 20                                               |
| 2015            |                                              | 13                                    | 17                                            | 3                                             | 5                                  | 8                                     | 8                                                                                  | 8                                                            | /                                                       | 12                        | 6                       | 1                                                |
| 2016            |                                              | 5                                     | 5                                             | 10                                            | 5                                  | 2                                     | 6                                                                                  | 4                                                            | 2                                                       | 1                         | 3                       | 3                                                |
| 2017            |                                              | 13                                    | 3                                             | 42                                            | 13                                 | 8                                     | 9                                                                                  | 9                                                            | 14                                                      | 17                        | 7                       | 4                                                |
| 2018            |                                              | 4                                     | 2                                             | 46                                            | 10                                 | 4                                     | 6                                                                                  | 12                                                           | 16                                                      | 10                        | 6                       | /                                                |
| 2013            | % test with correct outcome                  | 70.6                                  | 94.1                                          | /                                             | 85.7                               | 66.7                                  | /                                                                                  | /                                                            | /                                                       | 58.6                      | 100.0                   | 50.0                                             |
| 2014            |                                              | 92.4                                  | 65.4                                          | /                                             | 85.7                               | 73.7                                  | 100.0                                                                              | /                                                            | /                                                       | 77.3                      | 92.1                    | 70.0                                             |
| 2015            |                                              | 100.0                                 | 100.0                                         | 100.0                                         | 80.0                               | 87.5                                  | 100.0                                                                              | 71.4                                                         | /                                                       | 41.7                      | 100.0                   | 100.0                                            |
| 2016            |                                              | 100.0                                 | 100.0                                         | 100.0                                         | 100.0                              | 100.0                                 | 100.0                                                                              | 100.0                                                        | 100.0                                                   | 100.0                     | 66.7                    | 100.0                                            |
| 2017            |                                              | 53.8                                  | 100.0                                         | 97.5                                          | 53.8                               | 75.0                                  | 100.0                                                                              | 100.0                                                        | 92.9                                                    | 87.5                      | 100.0                   | 100.0                                            |
| 2018            |                                              | 100.0                                 | 100.0                                         | 100.0                                         | 100.0                              | 100.0                                 | 100.0                                                                              | 100.0                                                        | 100.0                                                   | 100.0                     | 100.0                   | /                                                |
| 2013            | % tests with false-negative result           | 29.4                                  | 5.9                                           | /                                             | 14.3                               | 33.3                                  | /                                                                                  | /                                                            | /                                                       | 41.4                      | 0.0                     | 50.0                                             |
| 2014            |                                              | 3.8                                   | 34.6                                          | /                                             | 14.3                               | 26.3                                  | 0.0                                                                                | /                                                            | /                                                       | 22.7                      | 7.9                     | 25.0                                             |
| 2015            |                                              | 0.0                                   | 0.0                                           | 0.0                                           | 20.0                               | 12.5                                  | 0.0                                                                                | 28.6                                                         | /                                                       | 58.3                      | 0.0                     | 0.0                                              |
| 2016            |                                              | 0.0                                   | 0.0                                           | 0.0                                           | 0.0                                | 0.0                                   | 0.0                                                                                | 0.0                                                          | 0.0                                                     | 0.0                       | 33.3                    | 0.0                                              |
| 2017            |                                              | 46.2                                  | 0.0                                           | 2.5                                           | 46.2                               | 25.0                                  | 0.0                                                                                | 0.0                                                          | 7.1                                                     | 12.5                      | 0.0                     | 0.0                                              |
| 2018            |                                              | 0.0                                   | 0.0                                           | 0.0                                           | 0.0                                | 0.0                                   | 0.0                                                                                | 0.0                                                          | 0.0                                                     | 0.0                       | 0.0                     | /                                                |
| 2013            | % tests with wrong mutation                  | 0.0                                   | 0.0                                           | /                                             | 0.0                                | 0.0                                   | /                                                                                  | /                                                            | /                                                       | 0.0                       | 0.0                     | 0.0                                              |
| 2014            |                                              | 3.8                                   | 0.0                                           | /                                             | 0.0                                | 0.0                                   | 0.0                                                                                | /                                                            | /                                                       | 0.0                       | 0.0                     | 5.0                                              |
| 2015            |                                              | 0.0                                   | 0.0                                           | 0.0                                           | 0.0                                | 0.0                                   | 0.0                                                                                | 0.0                                                          | /                                                       | 0.0                       | 0.0                     | 0.0                                              |
| 2016            |                                              | 0.0                                   | 0.0                                           | 0.0                                           | 0.0                                | 0.0                                   | 0.0                                                                                | 0.0                                                          | 0.0                                                     | 0.0                       | 0.0                     | 0.0                                              |
| 2017            |                                              | 0.0                                   | 0.0                                           | 0.0                                           | 0.0                                | 0.0                                   | 0.0                                                                                | 0.0                                                          | 0.0                                                     | 0.0                       | 0.0                     | 0.0                                              |
| 2018            |                                              | 0.0                                   | 0.0                                           | 0.0                                           | 0.0                                | 0.0                                   | 0.0                                                                                | 0.0                                                          | 0.0                                                     | 0.0                       | 0.0                     | /                                                |

**Supplemental table 4: Performance over time for the 11 most frequently used c.2369C>T p.(Thr790Met) detection methods. (Continued)**

| EQA scheme year | Method for c.2369C>T p.(Thr790Met) detection | Commercial kit                        |                                               |                                               |                                    |                                       | Next-generation sequencing                                                         |                                                              |                                                         | Non-commercial sequencing |                         |                                                  |
|-----------------|----------------------------------------------|---------------------------------------|-----------------------------------------------|-----------------------------------------------|------------------------------------|---------------------------------------|------------------------------------------------------------------------------------|--------------------------------------------------------------|---------------------------------------------------------|---------------------------|-------------------------|--------------------------------------------------|
|                 |                                              | Therascreen EGFR RGQ PCR Kit (Qiagen) | Cobas EGFR Mutation detection Test v1 (Roche) | Cobas EGFR Mutation detection Test v2 (Roche) | Therascreen EGFR Pyro Kit (Qiagen) | EGFR Mutation Analysis Kit (EntroGen) | Ion Ampliseq Custom panel - regions selected by the laboratory (Life technologies) | Ion AmpliSeq Colon and Lung Cancer Panel (Life technologies) | TruSight Tumor OncoPanel / TruSight Tumor 15 (Illumina) | Dideoxy sequencing        | High-resolution melting | TaqMan-based sequencing (ARMS/LNA/PNA/CAST-PCRs) |
| 2013            | % tests with a technical failure             | 5.6                                   | 10.5                                          | /                                             | 0.0                                | 0.0                                   | /                                                                                  | /                                                            | /                                                       | 9.4                       | 25.0                    | 0.0                                              |
| 2014            |                                              | 0.0                                   | 0.0                                           | /                                             | 2.0                                | 0.0                                   | 0.0                                                                                | /                                                            | /                                                       | 0.0                       | 0.0                     | 0.0                                              |
| 2015            |                                              | 15.4                                  | 0.0                                           | 0.0                                           | 0.0                                | 0.0                                   | 0.0                                                                                | 12.5                                                         | /                                                       | 0.0                       | 16.7                    | 0.0                                              |
| 2016            |                                              | 0.0                                   | 0.0                                           | 0.0                                           | 0.0                                | 0.0                                   | 0.0                                                                                | 0.0                                                          | 0.0                                                     | 0.0                       | 0.0                     | 0.0                                              |
| 2017            |                                              | 0.0                                   | 33.3                                          | 4.8                                           | 0.0                                | 0.0                                   | 0.0                                                                                | 0.0                                                          | 0.0                                                     | 5.9                       | 0.0                     | 0.0                                              |
| 2018            |                                              | 0.0                                   | 0.0                                           | 0.0                                           | 0.0                                | 0.0                                   | 0.0                                                                                | 0.0                                                          | 0.0                                                     | 0.0                       | 0.0                     | /                                                |

Technical failures are represented with respect to the total number of tests. Correct results, false-negatives and wrong mutations are calculated in relation to the total number of analyzable tests (total tests minus technical failures). The percentage of correct and incorrect results and technical failures across all scheme years and individual methods is given in **Supplemental Table 3**. Because of the low number of tests performed by a specific method in a given year, results are presented on a descriptive level only. Analysis methods are represented as reported by the participants in the electronic datasheets. Abbreviations: #, number; /, not applicable; ARMS, Amplification Refractory Mutation System; CAST, Competitive allele-specific TaqMan; EGFR, epidermal growth factor receptor; EQA, external quality assessment; LNA, locked nucleic acid; PCR, polymerase chain reaction; PNA, peptide nucleic acid.
