# Supplementary material for: Sensitive detection methods are key to identify secondary EGFR c.2369C>T p.(Thr790Met) in non-small cell lung cancer tissue samples
Source: Springer Nature journal article supplement (doi:10.1186/s12885-020-06831-3), 2020-05-01
Supplement: MOESM6 [file 17948206]

**Supplemental Figure 1: Ranked biserial correlation between variant allele frequencies**

**and incorrect outcomes (panel A) or technical failures (panel B).**

Title Sensitive detection methods are key to identify secondary EGFR c.2369C>T p.(Thr790Met) in non-small cell lung cancer tissue samples.

Journal BMC Cancer

Authors Cleo Keppens, Elisabeth MC Dequeker, Etienne Rouleau, Nils 't Hart, Lukas Bubendorf, Kelly Dufraing, Céline Garrec, Paul Guéguen, Aude Lamy, Antonio Marchetti, Patrick Pauwels, Ales Ryska, Véronique Tack, Luigi Tornillo, Kaat Van Casteren, Jan H von der Thüsen, Karen Zwaenepoel, Birgit Lissenberg-Witte, Erik Thunnissen, Ed Schuuring

Correspondence Prof. dr. Ed Schuuring  
Department of Pathology (HPC EA10)  
University Medical Center Groningen  
PO Box 30001, 9700 RB  
Groningen, the Netherlands  
Tel: (+31) 50 361 9623  
Email: [e.schuuring@umcg.nl](mailto:e.schuuring@umcg.nl)

**Supplemental figure 1: Ranked biserial correlation between variant allele frequencies and incorrect outcomes (panel A) or technical failures (panel B).**

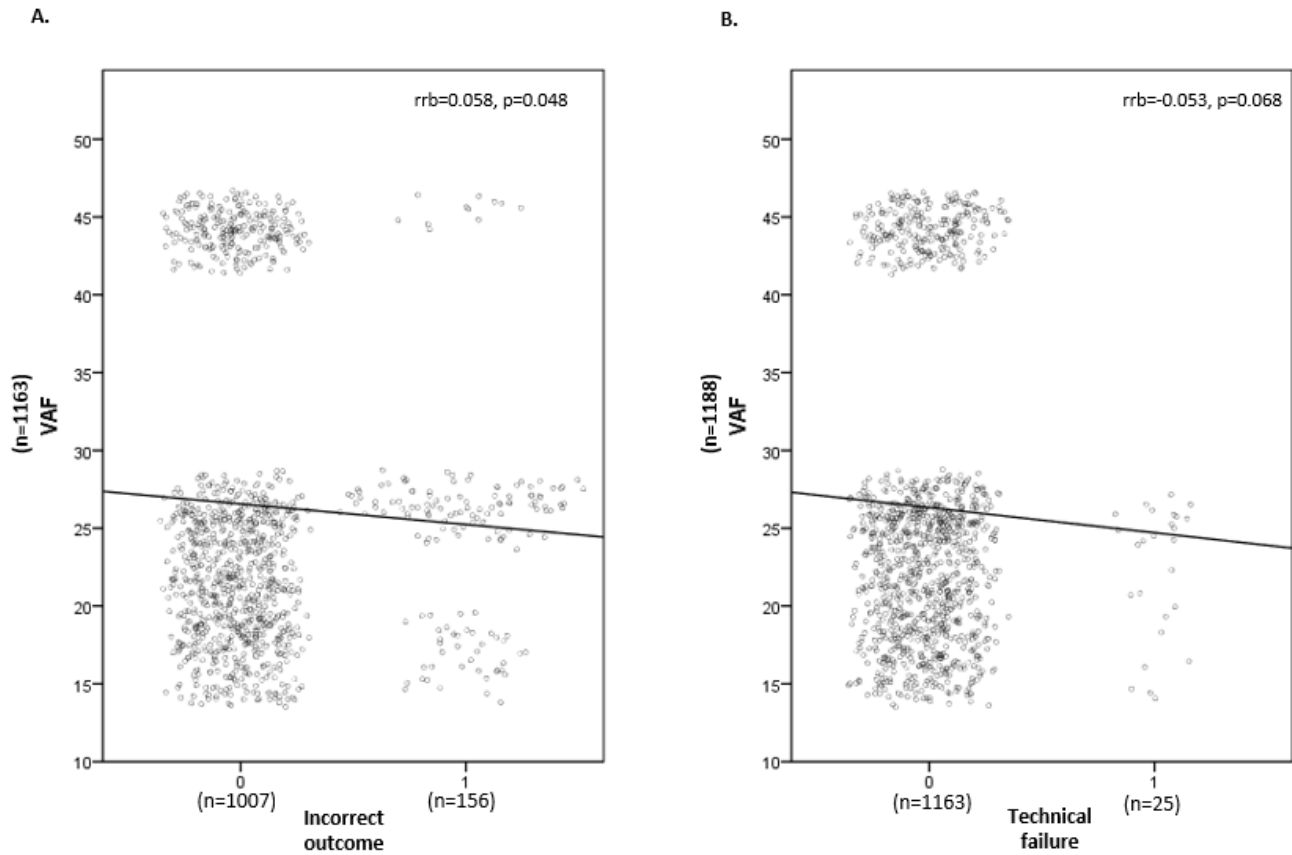

Statistics were performed using IBM SPSS Statistics version 25 (IBM, Armonk, NY, USA). Jitter was applied to minimize overlapping data points. A ranked biserial correlation was performed with the occurrence of an error (false-negative or wrong mutation) or technical failure as dichotomous variable (1:present versus 0:not present) and VAF as ordinal variable **A**. For correlation of the VAF with false-negative and incorrect mutations, only analyzable cases were taken into account, i.e. 1188 tests with exclusion of 25 technical failures. **B**. For correlation of the technical failures all tests were taken into account i.e. 1188 tests. Abbreviations: rrb, ranked biserial correlation coefficient; VAF, variant allele frequency.
